# Supplementary material for: Transcription regulation of restriction-modification system Esp1396I
Source: PubMed Central journal article supplement — Nucleic Acids Res. 2009 Mar 30;37(10):3354–66. doi: 10.1093/nar/gkp210 (PMC2691842; doi:10.1093/nar/gkp210), 2009-03-30
Supplement: gkp210_1.pdf [file gkp210_1.pdf]

**Supplementary table. Sedimentation velocity parameters for complexes of C.Esp1396I with 35 bp DNA fragments containing *Pesp1396ICR* and *Pesp1396IM* binding sites**

| <b>Species</b>         | <b>s<sup>a</sup></b><br><b>(x 10<sup>-13</sup> s)</b> | <b>s<sub>20,w</sub><sup>b</sup></b><br><b>(x 10<sup>-13</sup> s)</b> | <b>M<sub>r</sub><sup>c</sup></b><br><b>(kDa)</b> | <b>M<sub>r</sub><sup>d</sup></b><br><b>(kDa)</b> | <b>f/f<sub>0</sub><sup>e</sup></b> |
|------------------------|-------------------------------------------------------|----------------------------------------------------------------------|--------------------------------------------------|--------------------------------------------------|------------------------------------|
| <b>CR-promoter</b>     | 2.69                                                  | 2.81                                                                 | 23.7                                             | 22.2                                             | 1.95                               |
| <b>4:1 protein:DNA</b> | 3.94                                                  | 4.12                                                                 | 60.0                                             | 60.2                                             | 1.64                               |
| <b>M-promoter</b>      | 2.59                                                  | 2.71                                                                 | 23.5                                             | 22.2                                             | 2.00                               |
| <b>2:1 protein:DNA</b> | 3.29                                                  | 3.39                                                                 | 40.3                                             | 41.2                                             | 1.71                               |

<sup>a</sup> Experimental sedimentation coefficient obtained from SEDFIT

<sup>b</sup> Corrected sedimentation coefficient

<sup>c</sup> Experimental M<sub>r</sub> from c(M) plot

<sup>d</sup> Theoretical M<sub>r</sub> for DNA and DNA-protein complexes

<sup>e</sup> Frictional ratio obtained from SEDFIT

**Supplementary Figure 1. Sedimentation equilibrium analysis of the dimerisation of C.Esp1396I**

Data were collected at 15, 18 and 21 hours, monitoring absorption at a wavelength of 275 nm. A representative absorption profile is shown after 15 hours, with a rotor speed of 28,000 rpm and protein concentration 64  $\mu$ M.

**Supplementary Figure 2. Sedimentation velocity analysis of C.Esp1396I-DNA complexes.**

Data from a single velocity experiment (*Pesp1396IM* DNA duplex), together with the residuals from the fit. For clarity, every fifth scan is shown.

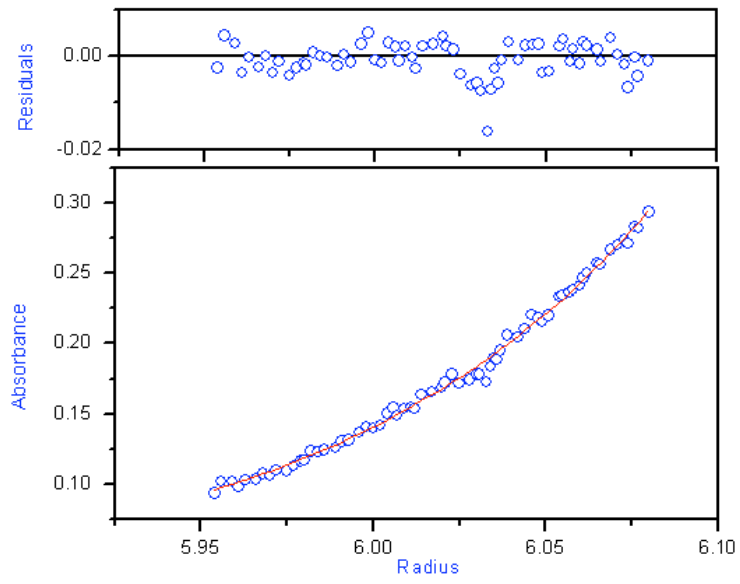

**Supplementary Figure 1.**

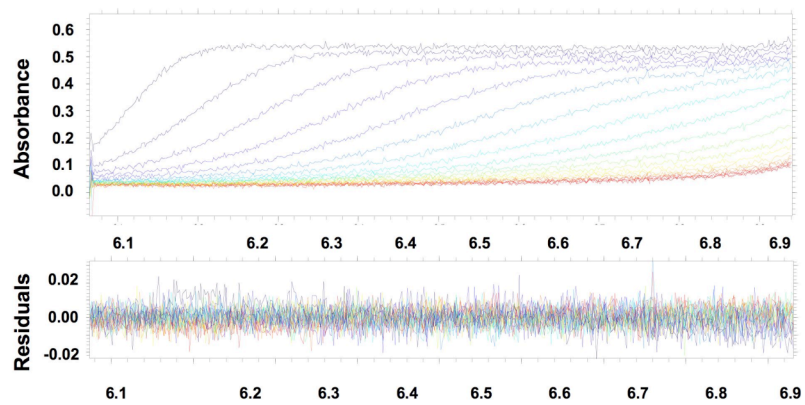

**Supplementary Fig. 2**
